# Supplementary material for: Water Effective Diffusion Coefficient in Dairy Powder Calculated by Digital Image Processing and through Machine Learning Algorithms of CLSM Micrographs
Source: Foods. 2023 Dec 27;13(1):94. doi: 10.3390/foods13010094 (PMC10778944; doi:10.3390/foods13010094)
Supplement: Supplementary file 1 [file foods-13-00094-s001.zip › Matlab script.xlsx]

## Sheet: Sheet1
	Image processing
Step 1	image_powder_ud.m
		%Binarized image and labeling
		Binarized function
			binary_im
				background = imopen(temp,strel('disk',5));
				Global image threshold using Otsu's method [level EM] = graythresh(I3);
					[1] Otsu, N., "A Threshold Selection Method from Gray-Level Histograms," IEEE Transactions on Systems, Man, and Cybernetics, Vol. 9, No. 1, 1979, pp. 62-66.
				Convert image to binary image, based on threshold, im2bw
		bwlabeln	Label connected components in binary image
		regionprops	Measure properties of image regions
		%Identify area and boudary of each particle
			Diffusion area
			fill area to get the total area
			regionprops to get the bounding box
			area_general=[area_diff; area_fill; area_bd_box]
		function
			bw_fill=fill_region(BW)
				%Selecting Regions Based on Certain Criteria
				idx = find([stats.Area] > 5);
				% Label connected components in binary image
				tam2 = bwmorph(tam,'close',20);				Performs morphological closing (dilation followed by erosion).
				tam2 = imfill(tam2,'holes');				Fill image regions and holes
			bw_fill=filling_area(BW)
				%smooth the boundary
				se = strel('disk',3);
				closeBW = imclose(BW,se);
				ismember array elements that are members of set
	Out put
		Area_ID	Area of each powder particle as a function of time during rehydration
		L	Label matrix of powder particles as a function of time during rehydration
		bd_obj_ID	Boundary information of each powder particle as a function of time during rehydration
		origin	Original images
Step 2	diff_powder_ud.m
		%Identify the total area and relative intensity of each particle over time
			function
			[total_area, mean_int]=area_int_obj(obj, id, L_temp_j, max_int, min_int);
			%Determination of total area, mean_int
				%Normalisation of intensity
				intensity=(intensity-min_int)/(max_int-min_int);
				the mean_int representing the concentration of the dye diffusing to the powder particle during rehydration.
Step 3	simulation_diff2.m
	% Identify the bad segmentstion and remove
		min(area)==0, object will be removed
		min(int_mean)>0.5, the oject will be removed (minimal 50% area of the particle is rehydrated)
	%Correction for the signal
		int_mean=diff_conc_correction(time, int_mean, crit_val);
			% A critical value is the difference of intensity between the two time steps.
	%Diffusion calculation
		Computed radius of the particle from the image
		int_model=diffusion_sphere_ud2(time, Diff);
		Assuming spherical geometry
			m=1000;
			for i=1:length(t);
			coeff=0;
			for j=1:m
			coeff=coeff+1/(j^2)*exp(-Diff*j*j*pi*pi*t(i)/(R_obj^2));
			end;
			int(i)=1-6/(pi*pi)*coeff;
			end;
		Diff_est= fminsearch('residual2',Diff);				Find minimum of unconstrained multivariable function using derivative-free method
		r=residual2(Diff)
		with r=sum((int_model-int_mean).^2);
% Other function
	plotting_Radius_diff.m
	diff_powder_plotting.m
		Plotting the dye penetation of a certaain powder i
			Change to function ?
	plotting_binary_labelled_image.m
		Plotting the binary and labelled image
	plotting_diffusion_different_particles
